# Supplementary material for: Plastid–Nuclear Interaction and Accelerated Coevolution in Plastid Ribosomal Genes in Geraniaceae
Source: PubMed Central journal article supplement — Genome Biol Evol. 2016 May 13;8(6):1824–38. doi: 10.1093/gbe/evw115 (PMC4943186; doi:10.1093/gbe/evw115), 2016-05-13
Supplement: supp_evw115_Supplementary_Materials.pdf [file supp_evw115_Supplementary_Materials.pdf]

## Supplementary Materials

### Weng et al., --Plastid-nuclear interaction and accelerated coevolution in plastid ribosomal genes in Geraniaceae

#### Supplementary Figures

**Figure S1.** Schematic representation of consecutive substitutions.

**Figure S2.** Distribution of  $\omega$  for CpRP and NuCpRP on the Geraniaceae phylogeny.

**Figure S3.** Comparison of the selection intensity parameter ( $k$ ) for CpRP and NuCpRP.

**Figure S4.** Matrix of p-values for the type I coevolution statistics based on alignments that only include contact residues.

#### Supplementary Tables

**Table S1.** Sources for plastid- and nuclear- encoded genes included in the study.

**Table S2.** Accession numbers for nuclear-encoded genes from *Arabidopsis thaliana*, *Vitis vinifera*, *Gossypium raimondii*, *Eucalyptus grandis* and *Citrus sinensis*.

**Table S3.** Likelihood ratio test results for rate comparison between Geraniaceae and outgroups.

**Table S4.** Tests for relaxed selection using RELAX.

**Table S5.** Proportion of ribosome protein identified as contact residues.

**Table S6.** Pair-wise amino acid sequence identity of ribosomal proteins.

#### Supplementary Data

**Data file S1.** Sequence alignments included in the study (zip file).

**Data file S2.** Coevolution analysis results (excel file).

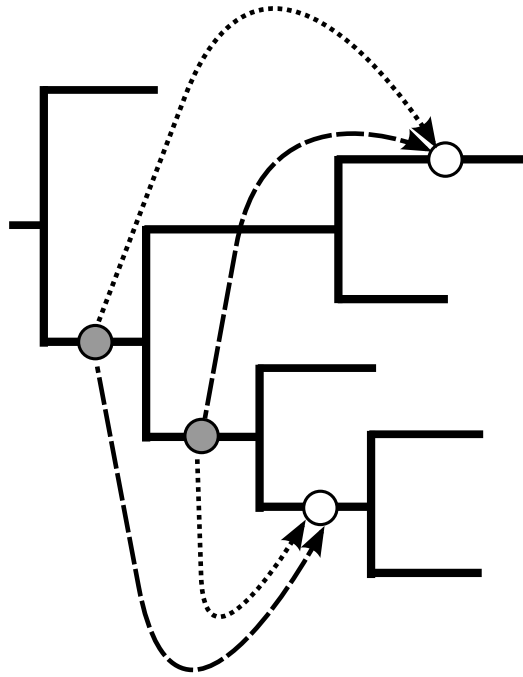

**Figure S1.** Schematic representation of consecutive substitutions.

Grey dots denote a nonsynonymous substitution at site  $i$  in leading protein. Open dots denote nonsynonymous substitution at site  $j$  in trailing protein. Dotted lines indicate consecutive nonsynonymous substitutions between site  $i$  of leading protein and site  $j$  in trailing protein because they occur in the same lineage and are not separated by additional substitutions. Dashed lines are nonconsecutive nonsynonymous substitutions because they are not in the same lineage or there are additional substitutions between them.

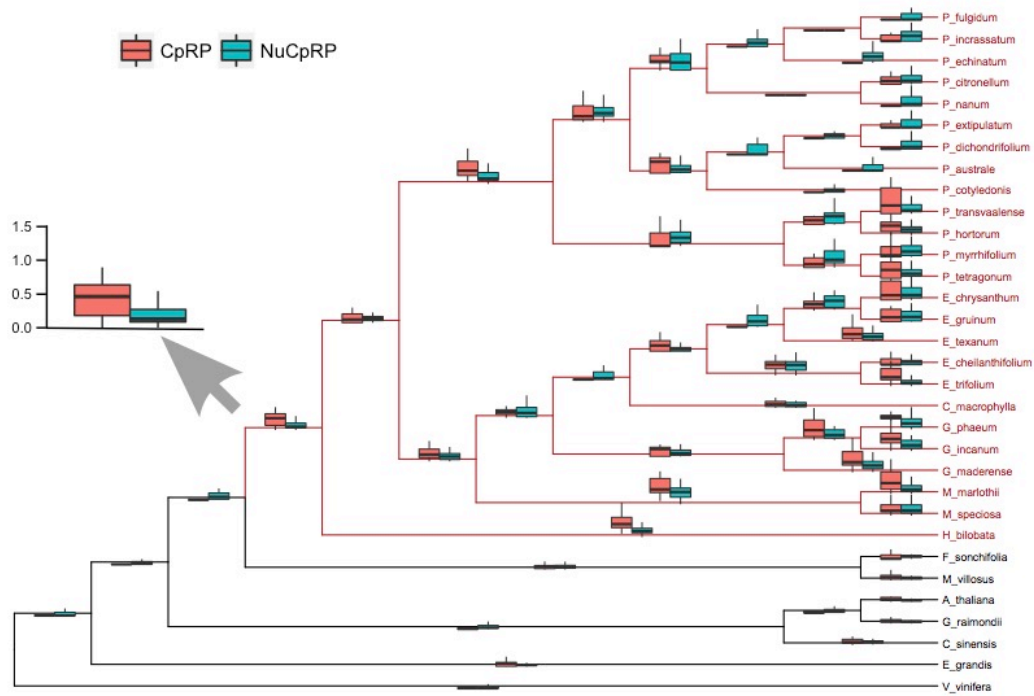

**Figure S2.** Distribution of  $\omega$  for CpRP and NuCpRP on the Geraniaceae phylogeny. Geraniaceae and outgroups branches are indicated in red and black, respectively. Boxplots of branch-specific  $\omega$  between CpRP and NuCpRP are shown on each branch. The y-axes of all boxplots (see inset example) are in the same scale. The figure was generated using ggtree package (Yu et al. submitted)

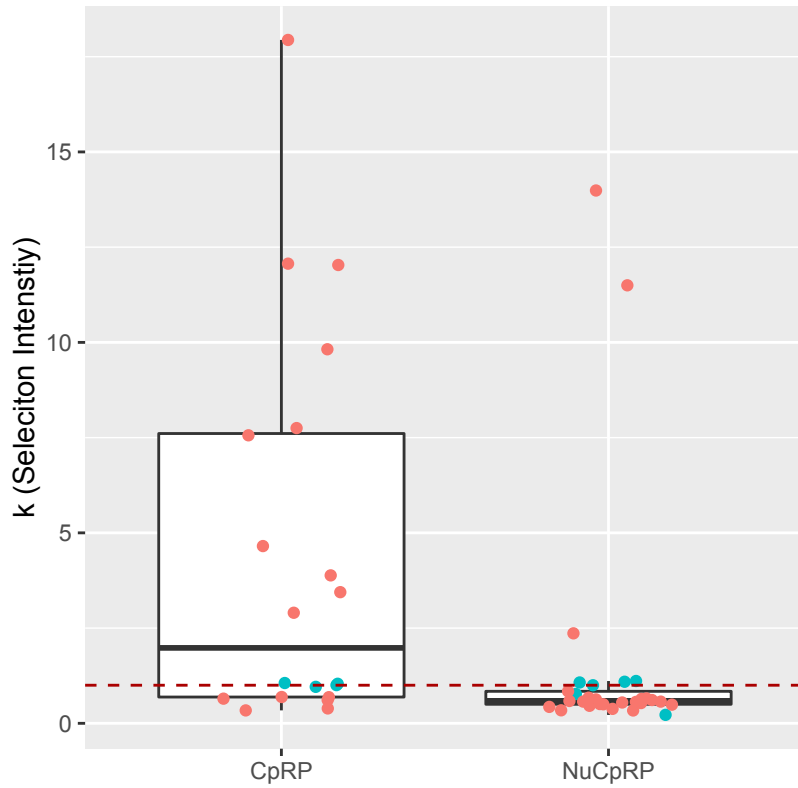

**Figure S3.** Comparison of the selection intensity parameter ( $k$ ) for CpRP and NuCpRP. The selection intensity parameter was estimated using RELAX (Wertheim et al. 2015). The significant and non-significant results are indicated by red and green dots, respectively.

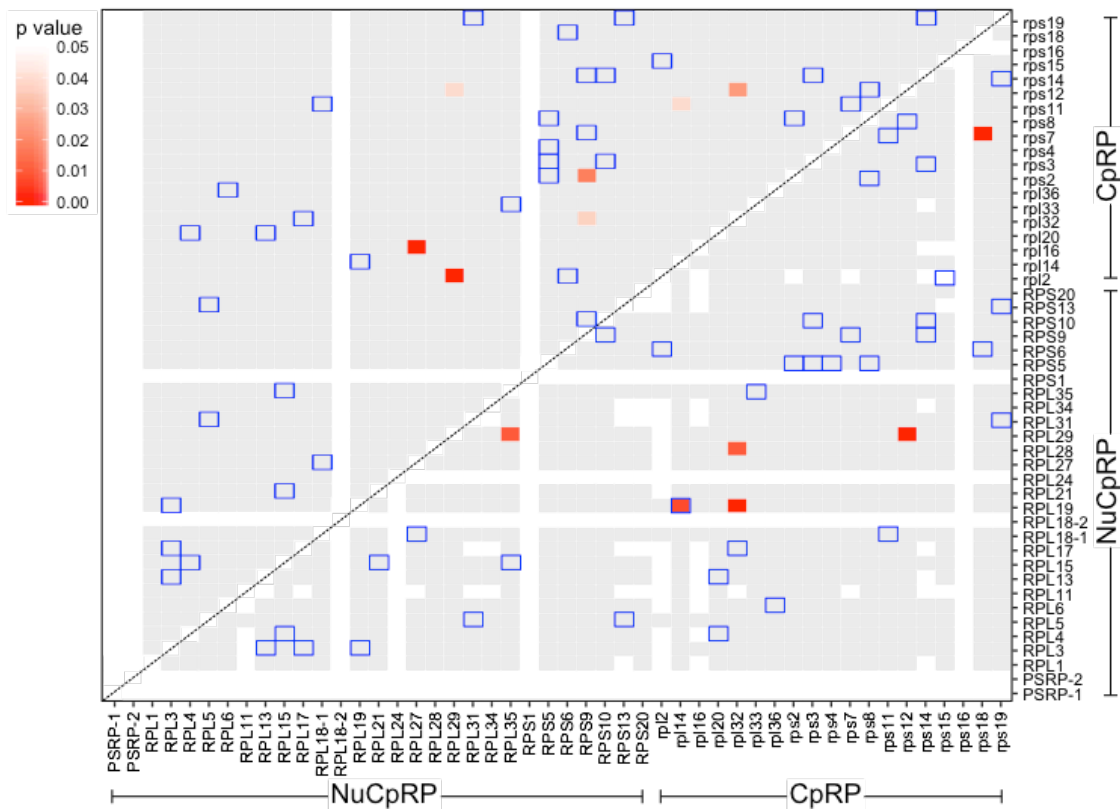

**Figure S4.** Matrix of p-values for the type I coevolution statistics based on alignments that only include contact residues. The type I coevolution statistic for a protein pair is defined as the number of codons that share nonsynonymous substitutions on three branches. False discovery rate adjusted p-values smaller than 5% are highlighted in red gradient. The nonsignificant p-values are shown in grey squares. The blue open squares indicate the protein pairs that have residues within 10Å. The protein pairs that did not have valid type I coevolution statistics are in white squares. Above and below the diagonal are results from protein and rRNA contact residues, and results from protein contact residues, respectively.

**Supplementary Table S1.** Sources for plastid- and nuclear-encoded genes included in the study.

|                                                         | Plastid-encoded genes | Nuclear-encoded genes <sup>1</sup> |
|---------------------------------------------------------|-----------------------|------------------------------------|
| <i>Vitis vinifera</i>                                   | NC_007957             | Phytozome v9.1                     |
| <i>Eucalyptus grandis</i>                               | NC_014570             | Phytozome v9.1                     |
| <i>Citrus sinensis</i>                                  | NC_008334             | Phytozome v9.1                     |
| <i>Gossypium raimondii</i>                              | NC_016668             | Phytozome v9.1                     |
| <i>Arabidopsis thaliana</i>                             | NC_000932             | TAIR                               |
| <i>Melianthus villosus</i>                              | NC_023256             | SRX910270                          |
| <i>Francoa sonchifolia</i>                              | NC_021101             | SRX910417                          |
| <i>Hypseocharis bilobata</i>                            | NC_023260             | SRX910270                          |
| <i>Pelargonium tetragonum</i>                           | KM527899              | SRX911056                          |
| <i>Pelargonium myrrhifolium</i>                         | KM527895              | SRX908171                          |
| <i>Pelargonium hortorum</i>                             | NC_008454             | SRX148706                          |
| <i>Pelargonium transvaalense</i>                        | KM527900              | SRX910975                          |
| <i>Pelargonium cotyledonis</i>                          | KM459516              | SRX910267                          |
| <i>Pelargonium australe</i>                             | KM459517              | SRX910974                          |
| <i>Pelargonium dichondrifolium</i>                      | KM459515              | SRX910883                          |
| <i>Pelargonium extipulatum</i>                          | KM527892              | SRX908169                          |
| <i>Pelargonium nanum</i>                                | KM527896              | SRX910973                          |
| <i>Pelargonium citronellum</i>                          | KM527888              | SRX910186                          |
| <i>Pelargonium echinatum</i>                            | KM527891              | SRX908170                          |
| <i>Pelargonium incrassatum</i>                          | KM527894              | SRX910811                          |
| <i>Pelargonium fulgidum</i>                             | KM527893              | SRX910878                          |
| <i>Monsonia emarginata</i>                              | KT692738              | SRX910269                          |
| <i>Monsonia marlothii</i>                               | KT692739              | SRX911055                          |
| <i>Geranium maderense</i>                               | KT760576              | SRX190475                          |
| <i>Geranium incanum</i>                                 | KT760575              | SRX910268                          |
| <i>Geranium phaem</i>                                   | KT760577              | SRX911054                          |
| <i>California macrophylla</i>                           | JQ031013              | SRX910976                          |
| <i>Erodium texanum</i>                                  | NC_014569             | SRX907966                          |
| <i>Erodium gruinum</i>                                  | KF804069              | SRX908000                          |
| <i>Erodium chrysanthum</i>                              | KJ701602              | SRX907975                          |
| <i>Erodium trifolium</i>                                | KF441758              | SRX900105                          |
| <i>Erodium foetidum</i> ssp.<br><i>cheilanthifolium</i> | JQ014209              | SRX907801                          |

<sup>1</sup>Accession numbers of nuclear-encoded genes obtained from Phytozome and TAIR are listed in Supplementary Table S2. SRX numbers are accession number for the Short Read Archive at GenBank reported in Ruhlman et al. 2015.

**Supplementary Table S2.** Accession numbers for nuclear-encoded genes from *Arabidopsis thaliana*, *Vitis vinifera*, *Gossypium raimondii*, *Eucalyptus grandis* and *Citrus sinensis*.

|        | Gene symbol | Gene description                  | Uniprot ID <sup>1</sup> | <i>Arabidopsis thaliana</i> <sup>2</sup> | <i>Vitis vinifera</i> <sup>3</sup>   | <i>Gossypium raimondii</i> <sup>3</sup> | <i>Eucalyptus grandis</i> <sup>3</sup> | <i>Citrus sinensis</i> <sup>3</sup>  |
|--------|-------------|-----------------------------------|-------------------------|------------------------------------------|--------------------------------------|-----------------------------------------|----------------------------------------|--------------------------------------|
| NuCyRP | RPL10AA     | 60S ribosomal protein L10a-1      | Q8VZB9                  | AT1G08360.1                              | GSVIVT0103384100<br>1 PACid:17839478 | Gorai.006G112000.5<br> PACid:26831055   | Eucgr.J00492.2 P<br>ACid:23598268      | orange1.1g027876<br>m PACid:18111118 |
| NuCyRP | RPL12A      | 60S ribosomal protein L12-1       | P50883                  | AT2G37190.1                              | GSVIVT0101627400<br>1 PACid:17826737 | Gorai.013G266700.1<br> PACid:26787487   | Eucgr.K03247.1 <br>PACid:23604953      | orange1.1g031095<br>m PACid:18097625 |
| NuCyRP | RPL17A      | 60S ribosomal protein L17-1       | Q93VI3                  | AT1G27400.1                              | GSVIVT0101044900<br>1 PACid:17822617 | Gorai.004G276000.1<br> PACid:26773005   | Eucgr.K02735.2 <br>PACid:23604358      | orange1.1g030676<br>m PACid:18102320 |
| NuCyRP | RPL23AA     | 60S ribosomal protein L23a-1      | Q8LD46                  | AT2G39460.1                              | GSVIVT0102504100<br>1 PACid:17833112 | Gorai.011G249300.1<br> PACid:26811627   | Eucgr.L03160.4 <br>PACid:23607662      | orange1.1g031794<br>m PACid:18095316 |
| NuCyRP | RPL26B      | 60S ribosomal protein L26-2       | Q9FJX2                  | AT5G67510.1                              | GSVIVT0100012100<br>1 PACid:17816726 | Gorai.004G263100.1<br> PACid:26775957   | Eucgr.I00709.1 P<br>ACid:23595242      | orange1.1g032182<br>m PACid:18124616 |
| NuCyRP | RPL3A       | 60S ribosomal protein L3-1        | P17094                  | AT1G43170.1                              | GSVIVT0103455500<br>1 PACid:17839987 | Gorai.009G255300.4<br> PACid:26769932   | Eucgr.F02696.2 <br>PACid:23583563      | orange1.1g038172<br>m PACid:18091957 |
| NuCyRP | RPL3B       | 60S ribosomal protein L3-2        | P22738                  | AT1G61580.1                              | GSVIVT0102324100<br>1 PACid:17831785 | Gorai.012G169700.1<br> PACid:26827058   | Eucgr.I02767.1 P<br>ACid:23597566      | orange1.1g016469<br>m PACid:18113395 |
| NuCyRP | RPL4A       | 60S ribosomal protein L4-1        | Q9SF40                  | AT3G09630.1                              | GSVIVT0102554700<br>1 PACid:17833516 | Gorai.007G374700.1<br> PACid:26784992   | Eucgr.K03205.1 <br>PACid:23604901      | orange1.1g048058<br>m PACid:18132026 |
| NuCyRP | RPL7A       | 60S ribosomal protein L7-1        | Q9SAI5                  | AT1G80750.1                              | GSVIVT0103423000<br>1 PACid:17839780 | Gorai.012G017500.3<br> PACid:26826918   | Eucgr.J03165.1 P<br>ACid:23601333      | orange1.1g025547<br>m PACid:18122310 |
| NuCyRP | RPL8B       | 60S ribosomal protein L8-2        | Q4PSL7                  | AT3G51190.1                              | GSVIVT0101455200<br>1 PACid:17825516 | Gorai.003G010500.1<br> PACid:26800318   | Eucgr.I02360.1 P<br>ACid:23597109      | orange1.1g024947<br>m PACid:18128096 |
| NuCyRP | RPP0C       | 60S acidic ribosomal protein P0-3 | P57691                  | AT3G11250.1                              | GSVIVT0103285700<br>1 PACid:17838724 | Gorai.012G076000.1<br> PACid:26825309   | Eucgr.G03042.1 <br>PACid:23588826      | orange1.1g020952<br>m PACid:18138282 |

|        |             |                                                                                                              |        |             |                                  |                                   |                               |                                  |
|--------|-------------|--------------------------------------------------------------------------------------------------------------|--------|-------------|----------------------------------|-----------------------------------|-------------------------------|----------------------------------|
| NuCyRP | RPS13B      | 40S ribosomal protein S13-2                                                                                  | P59224 | AT4G00100.1 | GSVIVT01027637001 PACid:17834981 | Gorai.001G174200.2 PACid:26823605 | Eucgr.D02462.1 PACid:23576371 | orange1.1g031857m PACid:18127912 |
| NuCyRP | RPS15AE     | 40S ribosomal protein S15a-5                                                                                 | Q9M0E0 | AT4G29430.1 | GSVIVT01016890001 PACid:17827227 | Gorai.009G030100.1 PACid:26768980 | Eucgr.G02917.1 PACid:23588686 | orange1.1g032980m PACid:18126775 |
| NuCyRP | RPS20C      | 40S ribosomal protein S20-1                                                                                  | P49200 | AT5G62300.1 | GSVIVT01018553001 PACid:17828462 | Gorai.006G064700.6 PACid:26834301 | Eucgr.K03281.1 PACid:23604997 | orange1.1g033482m PACid:18127830 |
| NuCyRP | RPS5B       | 40S ribosomal protein S5-2                                                                                   | P51427 | AT3G11940.1 | GSVIVT01026328001 PACid:17834075 | Gorai.002G154300.1 PACid:26792413 | Eucgr.A02519.2 PACid:23564451 | orange1.1g028585m PACid:18118282 |
| NuCyRP | RPS9C       | 40S ribosomal protein S9-2                                                                                   | Q9FLF0 | AT5G39850.1 | GSVIVT01011384001 PACid:17823254 | Gorai.006G020700.1 PACid:26830565 | Eucgr.I01938.1 PACid:23596646 | orange1.1g046291m PACid:18135051 |
| NuCyRP | RPSaA       | 40S ribosomal protein Sa-1                                                                                   | Q08682 | AT1G72370.1 | GSVIVT01016695001 PACid:17827063 | Gorai.011G056700.1 PACid:26810268 | Eucgr.J02605.2 PACid:23600765 | orange1.1g021262m PACid:18121035 |
| NuCyRP | CAO         | chlorophyll a oxygenase                                                                                      | Q9MBA1 | AT1G44446.1 | GSVIVT01008862001 PACid:17821388 | Gorai.005G089400.2 PACid:26806492 | Eucgr.F03791.1 PACid:23584980 | orange1.1g009406m PACid:18107778 |
| NuCpOT | CRTISO      | carotenoid isomerase                                                                                         | Q9M9Y8 | AT1G06820.1 | GSVIVT01022527001 PACid:17831348 | Gorai.002G153800.1 PACid:26791956 | Eucgr.A02546.1 PACid:23564477 | orange1.1g005823m PACid:18118279 |
| NuCpOT | OEP80       | outer envelope protein of 80 kDa;AtOEP80 is paralog to the chloroplastic protein translocation channel Toc75 | Q9C5J8 | AT5G19620.1 | GSVIVT01019114001 PACid:17828871 | Gorai.N002100.1 PACid:26777950    | Eucgr.K02362.3 PACid:23603943 | orange1.1g027843m PACid:18119637 |
| NuCpOT | PDH-E1 BETA | pyruvate dehydrogenase E1 beta                                                                               | Q9C6Z3 | AT1G30120.1 | GSVIVT01026353001 PACid:17834089 | Gorai.010G167000.1 PACid:26760281 | Eucgr.E01909.1 PACid:23578573 | orange1.1g015415m PACid:18112487 |
| NuCpOT | PSAK        | photosystem I subunit K                                                                                      | Q9SUI5 | AT1G30380.1 | GSVIVT01021584001 PACid:17830659 | Gorai.005G266900.1 PACid:26802279 | Eucgr.D00234.1 PACid:23573995 | orange1.1g033067m PACid:18114176 |
| NuCpOT | PSAL        | photosystem I subunit L                                                                                      | Q9SUI4 | AT4G12800.1 | GSVIVT01019114001 PACid:17828871 | Gorai.N002100.1 PACid:26777950    | Eucgr.K02362.3 PACid:23603943 | orange1.1g027843m PACid:18119637 |
| NuCpOT | PSB02       | photosystem II subunit O-2                                                                                   | Q9S841 | AT3G50820.1 | GSVIVT01009624001 PACid:17821997 | Gorai.007G208000.1 PACid:26783248 | Eucgr.I01025.1 PACid:23595525 | orange1.1g019870m PACid:18124684 |



|        |           |                                                              |        |             |                                  |                                   |                               |                                  |
|--------|-----------|--------------------------------------------------------------|--------|-------------|----------------------------------|-----------------------------------|-------------------------------|----------------------------------|
| NuCpOT | PSBQ-2    | photosystem II subunit Q-2                                   | Q41932 | AT4G05180.1 | GSVIVT01002809001 PACid:17818205 | Gorai.009G175700.1 PACid:26762434 | Eucgr.D00854.1 PACid:23574601 | orange1.1g026780m PACid:18114658 |
| NuCpOT | PSBR      | photosystem II subunit R                                     | P27202 | AT1G79040.1 | GSVIVT01020484001 PACid:17829836 | Gorai.009G354500.1 PACid:26762670 | Eucgr.F03186.5 PACid:23584217 | orange1.1g032633m PACid:18123674 |
| NuCpOT | PSY       | phytoene synthase                                            | P37271 | AT5G17230.1 | GSVIVT01035255001 PACid:17840447 | Gorai.001G083700.1 PACid:26819400 | Eucgr.F02913.1 PACid:23583838 | orange1.1g044623m PACid:18123242 |
| NuCpOT | SS1       | Glycogen/starch synthases                                    | Q9FNF2 | AT5G24300.1 | GSVIVT01038557001 PACid:17842794 | Gorai.012G002300.1 PACid:26825622 | Eucgr.K00387.1 PACid:23601847 | orange1.1g006091m PACid:18115573 |
| NuCpOT | TOC33     | translocon at the outer envelope membrane of chloroplasts 33 | O23680 | AT1G02280.1 | GSVIVT01011531001 PACid:17823369 | Gorai.N022100.2 PACid:26819295    | Eucgr.A02951.4 PACid:23564983 | orange1.1g022373m PACid:18136830 |
| NuCpOT | TOC64-III | translocon at the outer membrane of chloroplasts 64-III      | Q9LVH5 | AT3G17970.1 | GSVIVT01008433001 PACid:17821034 | Gorai.007G003700.2 PACid:26785262 | Eucgr.K02274.1 PACid:23603826 | orange1.1g008025m PACid:18133978 |
| NuCpOT | TSA1      | tryptophan synthase alpha chain                              | Q42529 | AT3G54640.1 | GSVIVT01000716001 PACid:17817114 | Gorai.004G218800.1 PACid:26773573 | Eucgr.G01098.3 PACid:23586709 | orange1.1g021527m PACid:18093093 |
| NuCpOT | TSB1      | tryptophan synthase beta-subunit 1                           | P14671 | AT5G54810.1 | GSVIVT01001997001 PACid:17817953 | Gorai.013G161300.1 PACid:26786795 | Eucgr.F03443.1 PACid:23584524 | orange1.1g012341m PACid:18098393 |
| NuCpRP | PSRP-1    | Plastid-specific ribosomal protein 1                         | Q94K97 | AT5G24490.1 | GSVIVT01038643001 PACid:17842866 | Gorai.004G125000.1 PACid:26774818 | Eucgr.A01406.1 PACid:23563165 | orange1.1g020955m PACid:18119458 |
| NuCpRP | PSRP-2    | Plastid-specific ribosomal protein 2                         | Q8VYM4 | AT3G52150.1 | GSVIVT01032039001 PACid:17838080 | Gorai.009G264000.3 PACid:26767920 | Eucgr.J01250.1 PACid:23599219 | orange1.1g025070m PACid:18102026 |
| NuCpRP | RPL1      | 50S ribosomal protein L1                                     | Q9LY66 | AT3G63490.1 | GSVIVT01032196001 PACid:17838199 | Gorai.004G170500.1 PACid:26775568 | Eucgr.G03333.1 PACid:23589199 | orange1.1g017710m PACid:18102866 |
| NuCpRP | RPL11     | 50S ribosomal protein L11                                    | Q9MAP3 | AT1G32990.1 | GSVIVT01019689001 PACid:17829269 | Gorai.007G018600.1 PACid:26780423 | Eucgr.D01648.1 PACid:23575396 | orange1.1g042478m PACid:18118570 |
| NuCpRP | RPL13     | 50S ribosomal protein L13                                    | Q9SYL9 | AT1G78630.1 | GSVIVT01014101001 PACid:17825159 | Gorai.002G048000.1 PACid:26795195 | Eucgr.F01365.1 PACid:23582036 | orange1.1g026067m PACid:18130212 |
| NuCpRP | RPL15     | 50S ribosomal protein L15                                    | P25873 | AT3G25920.1 | GSVIVT01011891001 PACid:17823646 | Gorai.005G191400.2 PACid:26803125 | Eucgr.G02317.1 PACid:23587913 | orange1.1g024515m PACid:18138875 |

|        |         |                                      |        |             |                                      |                                       |                                   |                                      |
|--------|---------|--------------------------------------|--------|-------------|--------------------------------------|---------------------------------------|-----------------------------------|--------------------------------------|
| NuCpRP | RPL17   | 50S ribosomal protein L17            | Q9M385 | AT3G54210.1 | GSVIVT0103792900<br>1 PACid:17842417 | Gorai.004G255400.1<br> PACid:26774838 | Eucgr.A00878.1 <br>PACid:23562581 | orange1.1g041707<br>m PACid:18106960 |
| NuCpRP | RPL18-1 | 50S ribosomal protein L18            | Q9SX68 | AT1G48350.1 | GSVIVT0101772000<br>1 PACid:17827843 | Gorai.004G096600.2<br> PACid:26772256 | Eucgr.L01079.1 <br>PACid:23606135 | orange1.1g030804<br>m PACid:18122212 |
| NuCpRP | RPL18-2 | Ribosomal L18p/L5e family<br>protein | Q9LJX6 | AT3G20230.1 | GSVIVT0102678700<br>1 PACid:17834368 | Gorai.005G145200.1<br> PACid:26802010 | Eucgr.F02580.1 <br>PACid:23583420 | orange1.1g048206<br>m PACid:18115723 |
| NuCpRP | RPL19   | 50S ribosomal protein L19-<br>2      | Q8RXX5 | AT5G47190.1 | GSVIVT0100211200<br>1 PACid:17818010 | Gorai.003G177300.2<br> PACid:26798453 | Eucgr.D02125.1 <br>PACid:23575955 | orange1.1g026573<br>m PACid:18103360 |
| NuCpRP | RPL21   | 50S ribosomal protein L21            | P51412 | AT1G35680.1 | GSVIVT0102689000<br>1 PACid:17834444 | Gorai.009G290100.1<br> PACid:26769294 | Eucgr.F02613.1 <br>PACid:23583455 | orange1.1g027519<br>m PACid:18092311 |
| NuCpRP | RPL24   | 50S ribosomal protein L24            | P92959 | AT5G54600.1 | GSVIVT0101457200<br>1 PACid:17825530 | Gorai.002G080800.1<br> PACid:26791820 | Eucgr.F03416.1 <br>PACid:23584479 | orange1.1g029417<br>m PACid:18126228 |
| NuCpRP | RPL27   | 50S ribosomal protein L27            | Q9FLN4 | AT5G40950.1 | GSVIVT0103308600<br>1 PACid:17838894 | Gorai.006G042400.2<br> PACid:26830759 | Eucgr.I01643.1 P<br>ACid:23596287 | orange1.1g029509<br>m PACid:18117563 |
| NuCpRP | RPL28   | 50S ribosomal protein L28            | O22795 | AT2G33450.1 | GSVIVT0102787000<br>1 PACid:17835144 | Gorai.005G052000.1<br> PACid:26801668 | Eucgr.H02995.1 <br>PACid:23592322 | orange1.1g031725<br>m PACid:18130178 |
| NuCpRP | RPL29   | 50S ribosomal protein L29            | Q9FJP3 | AT5G65220.1 | GSVIVT0101330400<br>1 PACid:17824605 | Gorai.007G237100.1<br> PACid:26782310 | Eucgr.I00441.1 P<br>ACid:23594992 | orange1.1g030809<br>m PACid:18128335 |
| NuCpRP | RPL3    | 50S ribosomal protein L3-1           | Q9SKX4 | AT2G43030.1 | GSVIVT0101935500<br>1 PACid:17828994 | Gorai.013G198500.1<br> PACid:26789431 | Eucgr.D01115.1 <br>PACid:23574885 | orange1.1g023905<br>m PACid:18110898 |
| NuCpRP | RPL31   | 50S ribosomal protein L31            | Q9FWS4 | AT1G75350.1 | GSVIVT0100974800<br>1 PACid:17822106 | Gorai.009G200300.1<br> PACid:26764750 | Eucgr.F01878.1 <br>PACid:23582638 | orange1.1g032493<br>m PACid:18092575 |
| NuCpRP | RPL34   | 50S ribosomal protein L34            | Q9LP37 | AT1G29070.1 | GSVIVT0102119300<br>1 PACid:17830354 | Gorai.010G158700.1<br> PACid:26758135 | Eucgr.D00519.3 <br>PACid:23574290 | orange1.1g031306<br>m PACid:18112475 |
| NuCpRP | RPL35   | 50S ribosomal protein L35            | Q8VZ55 | AT2G24090.1 | GSVIVT0101257400<br>1 PACid:17824132 | Gorai.004G106500.1<br> PACid:26773615 | Eucgr.C02515.1 <br>PACid:23571992 | orange1.1g031865<br>m PACid:18104157 |
| NuCpRP | RPL4    | 50S ribosomal protein L4             | O50061 | AT1G07320.1 | GSVIVT0102478800<br>1 PACid:17832913 | Gorai.004G006900.1<br> PACid:26772945 | Eucgr.J01939.1 P<br>ACid:23599973 | orange1.1g023024<br>m PACid:18111429 |

|        |       |                           |        |             |                                      |                                       |                                   |                                      |
|--------|-------|---------------------------|--------|-------------|--------------------------------------|---------------------------------------|-----------------------------------|--------------------------------------|
| NuCpRP | RPL5  | 50S ribosomal protein L5  | O04603 | AT4G01310.1 | GSVIVT0102700600<br>1 PACid:17834540 | Gorai.001G158300.1<br> PACid:26819956 | Eucgr.D02319.1 <br>PACid:23576205 | orange1.1g024440<br>m PACid:18137634 |
| NuCpRP | RPL6  | 50S ribosomal protein L6  | O23049 | AT1G05190.1 | GSVIVT0103059900<br>1 PACid:17837072 | Gorai.013G101000.1<br> PACid:26787029 | Eucgr.A01711.1 <br>PACid:23563493 | orange1.1g027306<br>m PACid:18134331 |
| NuCpRP | RPS1  | 30S ribosomal protein S1  | Q93VC7 | AT5G30510.1 | GSVIVT0103494000<br>1 PACid:17840233 | Gorai.005G069200.2<br> PACid:26804540 | Eucgr.H04084.2 <br>PACid:23593370 | orange1.1g015066<br>m PACid:18109752 |
| NuCpRP | RPS10 | 30S ribosomal protein S10 | Q9LK61 | AT3G13120.1 | GSVIVT0101464000<br>1 PACid:17825582 | Gorai.007G310400.1<br> PACid:26778146 | Eucgr.F03697.1 <br>PACid:23584853 | orange1.1g041275<br>m PACid:18114020 |
| NuCpRP | RPS13 | 30S ribosomal protein S13 | P42732 | AT5G14320.1 | GSVIVT0100893300<br>1 PACid:17821451 | Gorai.005G091500.1<br> PACid:26802809 | Eucgr.F03746.2 <br>PACid:23584921 | orange1.1g030930<br>m PACid:18107910 |
| NuCpRP | RPS20 | 30S ribosomal protein S20 | Q9ASV6 | AT3G15190.1 | GSVIVT0101429000<br>1 PACid:17825306 | Gorai.009G375600.1<br> PACid:26771393 | Eucgr.F01167.2 <br>PACid:23581851 | orange1.1g029900<br>m PACid:18100947 |
| NuCpRP | RPS5  | 30S ribosomal protein S5  | P93014 | AT2G33800.1 | GSVIVT0102108300<br>1 PACid:17830272 | Gorai.010G256400.3<br> PACid:26758859 | Eucgr.D00609.1 <br>PACid:23574371 | orange1.1g021869<br>m PACid:18112187 |
| NuCpRP | RPS6  | 30S ribosomal protein S6  | Q8VY91 | AT1G64510.1 | GSVIVT0101959300<br>1 PACid:17829186 | Gorai.008G256400.1<br> PACid:26816845 | Eucgr.D01771.1 <br>PACid:23575531 | orange1.1g027743<br>m PACid:18118695 |
| NuCpRP | RPS9  | 30S ribosomal protein S9  | Q9XJ27 | AT1G74970.1 | GSVIVT0100962800<br>1 PACid:17822000 | Gorai.010G013000.1<br> PACid:26759486 | Eucgr.A00474.2 <br>PACid:23562154 | orange1.1g042358<br>m PACid:18092513 |

<sup>1</sup>Uniprot IDs for NuCpRP and NuCyRP are listed.

<sup>2</sup>Accession numbers for TAIR database (<https://www.arabidopsis.org>).

<sup>3</sup>Accession number for Phytozome v9.1 (Goodstain et al., 2012).



**Supplementary Table S4.** Tests for relaxed selection using RELAX

| Gene_group | Gene    | p-value  | k*           | $\omega_1$ _test | $\omega_1$ _Ref | $\omega_1$ _percentage | $\omega_2$ _test | $\omega_2$ _Ref | $\omega_2$ _percentage | $\omega_3$ _test | $\omega_3$ _Ref | $\omega_3$ _percentage |
|------------|---------|----------|--------------|------------------|-----------------|------------------------|------------------|-----------------|------------------------|------------------|-----------------|------------------------|
| CpRP       | rpl2    | 8.07E-01 | 0.96         | 0.1824           | 0.1693          | 76.06                  | 0.2521           | 0.2373          | 21.58                  | 6.6486           | 7.2260          | 2.36                   |
| CpRP       | rpl14   | 9.52E-01 | 1.04         | 0.0000           | 0.0000          | 66.82                  | 1.0000           | 1.0000          | 32.85                  | 1907.0834        | 1466.4695       | 0.33                   |
| CpRP       | rpl16   | 6.78E-05 | <b>0.61</b>  | 0.1618           | 0.0493          | 92.95                  | 0.1694           | 0.0532          | 6.64                   | 42.1912          | 485.1908        | 0.41                   |
| CpRP       | rpl20   | 6.61E-01 | 1.06         | 0.0000           | 0.0000          | 54.46                  | 1.0000           | 1.0000          | 44.36                  | 502.1716         | 357.7103        | 1.18                   |
| CpRP       | rpl23   | 9.70E-03 | <b>2.90</b>  | 0.9026           | 0.9653          | 70.04                  | 1.0000           | 1.0000          | 25.02                  | 63.1791          | 4.1767          | 4.94                   |
| CpRP       | rpl32   | 2.88E-02 | <b>0.69</b>  | 0.0000           | 0.0000          | 36.08                  | 0.4470           | 0.3136          | 55.87                  | 83.7336          | 587.1441        | 8.06                   |
| CpRP       | rpl33   | 1.90E-02 | <b>12.03</b> | 0.0000           | 0.0272          | 74.22                  | 0.9699           | 0.9975          | 0.00                   | 2.0866           | 1.0630          | 25.78                  |
| CpRP       | rpl36   | 3.11E-04 | <b>17.94</b> | 0.0000           | 0.0000          | 90.54                  | 0.3816           | 0.9477          | 0.00                   | 4.8668           | 1.0922          | 9.46                   |
| CpRP       | rps2    | 9.73E-01 | 1.00         | 1.0000           | 1.0000          | 54.82                  | 0.0000           | 0.0000          | 44.88                  | 1445.4338        | 1466.4695       | 0.30                   |
| CpRP       | rps3    | 0.00E+00 | <b>0.39</b>  | 0.4088           | 0.1019          | 82.60                  | 0.4102           | 0.1028          | 15.33                  | 36.8950          | 10000.0000      | 2.06                   |
| CpRP       | rps4    | 3.91E-08 | <b>7.56</b>  | 0.0000           | 0.0000          | 59.00                  | 1.0000           | 1.0000          | 39.07                  | 87.6580          | 1.8068          | 1.93                   |
| CpRP       | rps7    | 1.56E-02 | <b>3.88</b>  | 0.0000           | 0.0000          | 47.22                  | 0.9205           | 0.9789          | 45.80                  | 13.0631          | 1.9408          | 6.98                   |
| CpRP       | rps8    | 2.93E-02 | <b>0.69</b>  | 0.3154           | 0.1899          | 86.77                  | 0.3208           | 0.1946          | 11.58                  | 7.7792           | 19.1747         | 1.65                   |
| CpRP       | rps11   | 4.39E-03 | <b>0.65</b>  | 0.2759           | 0.1372          | 80.86                  | 0.2802           | 0.1405          | 16.18                  | 7.7333           | 23.4589         | 2.96                   |
| CpRP       | rps12   | 3.90E-05 | <b>7.75</b>  | 0.0000           | 0.0000          | 85.93                  | 0.8637           | 0.9813          | 8.96                   | 17.5034          | 1.4470          | 5.12                   |
| CpRP       | rps14   | 3.89E-04 | <b>0.34</b>  | 0.5391           | 0.1613          | 5.47                   | 0.5700           | 0.1901          | 94.53                  | 1.0923           | 1.2977          | 0.00                   |
| CpRP       | rps15   | 5.21E-04 | <b>12.07</b> | 0.0000           | 0.0000          | 56.84                  | 1.0000           | 1.0000          | 37.49                  | 13.2218          | 1.2384          | 5.67                   |
| CpRP       | rps16   | 2.37E-03 | <b>3.44</b>  | 0.0000           | 0.0001          | 61.18                  | 0.7586           | 0.9228          | 36.26                  | 79.0601          | 3.5643          | 2.57                   |
| CpRP       | rps18   | 2.45E-12 | <b>4.65</b>  | 0.1220           | 0.6359          | 52.72                  | 1.0000           | 1.0000          | 35.93                  | 72.3561          | 2.5127          | 11.36                  |
| CpRP       | rps19   | 1.75E-06 | <b>9.82</b>  | 0.0000           | 0.0000          | 73.66                  | 1.0000           | 1.0000          | 23.56                  | 54.9700          | 1.5038          | 2.78                   |
| NuCpRP     | PSRP-1  | 4.70E-04 | <b>0.38</b>  | 0.0286           | 0.0001          | 72.92                  | 0.8658           | 0.6823          | 26.05                  | 17.0340          | 1851.8382       | 1.03                   |
| NuCpRP     | PSRP-2  | 0.00E+00 | <b>0.22</b>  | 0.0898           | 0.0000          | 62.07                  | 0.7714           | 0.3006          | 36.40                  | 5.1134           | 1911.9642       | 1.53                   |
| NuCpRP     | RPL1    | 2.45E-09 | <b>0.57</b>  | 0.1295           | 0.0277          | 84.26                  | 0.8027           | 0.6802          | 13.61                  | 8.4410           | 42.1770         | 2.13                   |
| NuCpRP     | RPL3    | 9.70E-04 | <b>0.65</b>  | 0.0341           | 0.0055          | 91.39                  | 0.6546           | 0.5205          | 7.91                   | 16.6437          | 76.2835         | 0.70                   |
| NuCpRP     | RPL4    | 6.43E-01 | 1.07         | 0.0242           | 0.0309          | 87.17                  | 1.0000           | 1.0000          | 12.63                  | 2439.0218        | 1466.2234       | 0.20                   |
| NuCpRP     | RPL5    | 6.91E-13 | <b>0.59</b>  | 0.1953           | 0.0640          | 93.05                  | 0.6792           | 0.5216          | 5.32                   | 14.3512          | 88.4655         | 1.63                   |
| NuCpRP     | RPL6    | 5.69E-01 | 1.09         | 0.0407           | 0.0529          | 86.39                  | 0.0886           | 0.1080          | 7.16                   | 3.6251           | 3.2629          | 6.45                   |
| NuCpRP     | RPL11   | 1.59E-03 | <b>0.63</b>  | 0.0623           | 0.0124          | 94.14                  | 0.9709           | 0.9544          | 5.30                   | 28.1204          | 195.2725        | 0.55                   |
| NuCpRP     | RPL13   | 9.84E-03 | <b>0.49</b>  | 0.0000           | 0.0000          | 85.84                  | 0.9597           | 0.9199          | 12.80                  | 8.6897           | 80.0320         | 1.36                   |
| NuCpRP     | RPL15   | 9.54E-01 | 1.00         | 0.0000           | 0.0000          | 83.71                  | 1.0000           | 1.0000          | 15.91                  | 165.0443         | 164.2793        | 0.38                   |
| NuCpRP     | RPL17   | 2.74E-04 | <b>0.61</b>  | 0.0329           | 0.0037          | 0.84                   | 0.1309           | 0.0357          | 96.71                  | 6.1198           | 19.4691         | 2.46                   |
| NuCpRP     | RPL18_1 | 6.48E-02 | <b>0.77</b>  | 0.0668           | 0.0301          | 88.62                  | 0.6348           | 0.5554          | 10.35                  | 8.5461           | 16.0618         | 1.03                   |
| NuCpRP     | RPL18_2 | 2.86E-01 | 0.84         | 0.0404           | 0.0222          | 91.19                  | 1.0000           | 1.0000          | 8.17                   | 17.7134          | 30.2782         | 0.64                   |
| NuCpRP     | RPL19   | 3.70E-09 | <b>0.46</b>  | 0.2632           | 0.0553          | 89.70                  | 0.2910           | 0.0687          | 5.17                   | 9.3785           | 128.4471        | 5.13                   |
| NuCpRP     | RPL21   | 1.42E-06 | <b>0.53</b>  | 0.1608           | 0.0326          | 88.36                  | 1.0000           | 1.0000          | 9.50                   | 26.1457          | 451.8318        | 2.14                   |
| NuCpRP     | RPL24   | 2.61E-09 | <b>0.55</b>  | 0.2270           | 0.0687          | 89.74                  | 0.4092           | 0.1992          | 8.26                   | 12.8419          | 100.5052        | 2.01                   |
| NuCpRP     | RPL27   | 4.68E-03 | <b>0.64</b>  | 0.0914           | 0.0237          | 86.33                  | 0.8170           | 0.7288          | 11.85                  | 13.7312          | 60.3146         | 1.82                   |
| NuCpRP     | RPL28   | 1.44E-02 | <b>2.36</b>  | 0.0000           | 0.0000          | 84.41                  | 0.0000           | 0.0001          | 0.07                   | 2.7150           | 1.5278          | 15.51                  |
| NuCpRP     | RPL29   | 0.00E+00 | <b>0.34</b>  | 0.0000           | 0.0000          | 30.37                  | 0.4272           | 0.0800          | 68.39                  | 22.2187          | 10000.0000      | 1.23                   |
| NuCpRP     | RPL31   | 4.73E-03 | <b>0.57</b>  | 0.0328           | 0.0025          | 76.02                  | 0.3899           | 0.1914          | 17.60                  | 3.0360           | 7.0228          | 6.38                   |
| NuCpRP     | RPL34   | 4.96E-06 | <b>0.50</b>  | 0.1328           | 0.0172          | 82.70                  | 0.6890           | 0.4725          | 15.67                  | 29.2288          | 891.4019        | 1.64                   |
| NuCpRP     | RPL35   | 7.62E-01 | 1.11         | 0.0000           | 0.0000          | 88.74                  | 1.0000           | 1.0000          | 9.64                   | 25.3522          | 18.5287         | 1.62                   |
| NuCpRP     | RPS1    | 0.00E+00 | <b>0.43</b>  | 0.2485           | 0.0390          | 96.72                  | 1.0000           | 1.0000          | 1.83                   | 17.4456          | 780.1329        | 1.45                   |
| NuCpRP     | RPS5    | 3.29E-13 | <b>11.50</b> | 0.0000           | 0.0000          | 84.50                  | 0.5800           | 0.9537          | 0.00                   | 3.3745           | 1.1116          | 15.50                  |
| NuCpRP     | RPS6    | 0.00E+00 | <b>0.34</b>  | 0.1420           | 0.0034          | 66.62                  | 0.5488           | 0.1747          | 30.42                  | 23.7551          | 10000.0000      | 2.96                   |
| NuCpRP     | RPS9    | 4.67E-08 | <b>0.56</b>  | 0.1508           | 0.0334          | 94.92                  | 0.1702           | 0.0416          | 2.21                   | 13.6074          | 108.8033        | 2.87                   |
| NuCpRP     | RPS10   | 1.42E-04 | <b>0.51</b>  | 0.1476           | 0.0236          | 1.97                   | 0.1479           | 0.0237          | 92.33                  | 5.8875           | 32.2430         | 5.69                   |
| NuCpRP     | RPS13   | 6.47E-03 | <b>0.67</b>  | 0.1209           | 0.0422          | 0.82                   | 0.1210           | 0.0423          | 95.37                  | 4.7939           | 10.4671         | 3.81                   |
| NuCpRP     | RPS20   | 5.57E-10 | <b>13.99</b> | 0.0000           | 0.0000          | 80.03                  | 0.7608           | 0.9806          | 0.00                   | 3.1889           | 1.0864          | 19.97                  |

\* selection intensity parameter (k) significantly deviated from one was in bold

**Supplementary Table S5.** Proportion of ribosome protein identified as contact residues.

| Gene group | Gene  | Sequence length <sup>1</sup> | Total contact residue <sup>2</sup> |                         | Protein contact residue <sup>3</sup> |                         | rRNA contact residue <sup>4</sup> |                         |
|------------|-------|------------------------------|------------------------------------|-------------------------|--------------------------------------|-------------------------|-----------------------------------|-------------------------|
|            |       |                              | Count                              | Percentage <sup>5</sup> | Count                                | Percentage <sup>5</sup> | Count                             | Percentage <sup>5</sup> |
| CpRP       | rps2  | 231                          | 92                                 | 39.8                    | 32                                   | 13.9                    | 82                                | 35.5                    |
| CpRP       | rps3  | 218                          | 141                                | 64.7                    | 95                                   | 43.6                    | 92                                | 42.2                    |
| CpRP       | rps4  | 201                          | 37                                 | 18.4                    | 37                                   | 18.4                    | 0                                 | 0.0                     |
| CpRP       | rps7  | 155                          | 105                                | 67.7                    | 43                                   | 27.7                    | 87                                | 56.1                    |
| CpRP       | rps8  | 134                          | 128                                | 95.5                    | 67                                   | 50.0                    | 94                                | 70.1                    |
| CpRP       | rps11 | 140                          | 107                                | 76.4                    | 70                                   | 50.0                    | 77                                | 55.0                    |
| CpRP       | rps12 | 123                          | 112                                | 91.1                    | 12                                   | 9.8                     | 112                               | 91.1                    |
| CpRP       | rps14 | 100                          | 98                                 | 98.0                    | 66                                   | 66.0                    | 86                                | 86.0                    |
| CpRP       | rps15 | 90                           | 75                                 | 83.3                    | 16                                   | 17.8                    | 67                                | 74.4                    |
| CpRP       | rps16 | 88                           | 69                                 | 78.4                    | 0                                    | 0.0                     | 69                                | 78.4                    |
| CpRP       | rps18 | 103                          | 57                                 | 55.3                    | 44                                   | 42.7                    | 44                                | 42.7                    |
| CpRP       | rps19 | 92                           | 78                                 | 84.8                    | 55                                   | 59.8                    | 64                                | 69.6                    |
| CpRP       | rpl32 | 57                           | 56                                 | 98.2                    | 47                                   | 82.5                    | 52                                | 91.2                    |
| CpRP       | rpl33 | 66                           | 62                                 | 93.9                    | 20                                   | 30.3                    | 62                                | 93.9                    |
| CpRP       | rpl36 | 104                          | 38                                 | 36.5                    | 21                                   | 20.2                    | 38                                | 36.5                    |
| CpRP       | rpl2  | 269                          | 220                                | 81.8                    | 1                                    | 0.4                     | 220                               | 81.8                    |
| CpRP       | rpl14 | 121                          | 92                                 | 76.0                    | 48                                   | 39.7                    | 69                                | 57.0                    |
| CpRP       | rpl16 | 135                          | 120                                | 88.9                    | 12                                   | 8.9                     | 120                               | 88.9                    |
| CpRP       | rpl20 | 119                          | 118                                | 99.2                    | 88                                   | 73.9                    | 96                                | 80.7                    |
| NuCpRP     | rps5  | 308                          | 136                                | 44.2                    | 96                                   | 31.2                    | 92                                | 29.9                    |
| NuCpRP     | rps6  | 168                          | 74                                 | 44.0                    | 46                                   | 27.4                    | 54                                | 32.1                    |
| NuCpRP     | rps9  | 197                          | 103                                | 52.3                    | 42                                   | 21.3                    | 96                                | 48.7                    |
| NuCpRP     | rps10 | 197                          | 80                                 | 40.6                    | 54                                   | 27.4                    | 69                                | 35.0                    |
| NuCpRP     | rps13 | 145                          | 68                                 | 46.9                    | 20                                   | 13.8                    | 68                                | 46.9                    |
| NuCpRP     | rps20 | 202                          | 82                                 | 40.6                    | 1                                    | 0.5                     | 82                                | 40.6                    |
| NuCpRP     | rpl31 | 144                          | 37                                 | 25.7                    | 37                                   | 25.7                    | 5                                 | 3.5                     |
| NuCpRP     | rpl34 | 152                          | 37                                 | 24.3                    | 1                                    | 0.7                     | 37                                | 24.3                    |
| NuCpRP     | rpl35 | 159                          | 62                                 | 39.0                    | 55                                   | 34.6                    | 62                                | 39.0                    |
| NuCpRP     | rpl1  | 352                          | 110                                | 31.3                    | 4                                    | 1.1                     | 106                               | 30.1                    |
| NuCpRP     | rpl3  | 259                          | 130                                | 50.2                    | 39                                   | 15.1                    | 120                               | 46.3                    |
| NuCpRP     | rpl4  | 293                          | 164                                | 56.0                    | 76                                   | 25.9                    | 151                               | 51.5                    |
| NuCpRP     | rpl5  | 220                          | 149                                | 67.7                    | 63                                   | 28.6                    | 112                               | 50.9                    |
| NuCpRP     | rpl6  | 223                          | 103                                | 46.2                    | 12                                   | 5.4                     | 102                               | 45.7                    |
| NuCpRP     | rpl11 | 224                          | 88                                 | 39.3                    | 2                                    | 0.9                     | 88                                | 39.3                    |
| NuCpRP     | rpl13 | 250                          | 111                                | 44.4                    | 34                                   | 13.6                    | 107                               | 42.8                    |
| NuCpRP     | rpl15 | 257                          | 134                                | 52.1                    | 52                                   | 20.2                    | 130                               | 50.6                    |
| NuCpRP     | rpl17 | 205                          | 113                                | 55.1                    | 29                                   | 14.1                    | 113                               | 55.1                    |
| NuCpRP     | rpl18 | 161                          | 100                                | 62.1                    | 18                                   | 11.2                    | 100                               | 62.1                    |
| NuCpRP     | rpl19 | 233                          | 93                                 | 39.9                    | 64                                   | 27.5                    | 58                                | 24.9                    |
| NuCpRP     | rpl21 | 257                          | 85                                 | 33.1                    | 58                                   | 22.6                    | 62                                | 24.1                    |
| NuCpRP     | rpl24 | 191                          | 90                                 | 47.1                    | 0                                    | 0.0                     | 90                                | 47.1                    |
| NuCpRP     | rpl27 | 198                          | 81                                 | 40.9                    | 29                                   | 14.6                    | 79                                | 39.9                    |
| NuCpRP     | rpl28 | 151                          | 71                                 | 47.0                    | 17                                   | 11.3                    | 69                                | 45.7                    |
| NuCpRP     | rpl29 | 173                          | 56                                 | 32.4                    | 32                                   | 18.5                    | 46                                | 26.6                    |
| Average    |       |                              |                                    | 57.5                    |                                      | 24.3                    |                                   | 50.3                    |

<sup>1</sup>Amino acid sequence length<sup>2</sup>Residues that are within 10Å distance of either amino acid residues in other proteins or nucleotide residues in rRNAs<sup>3</sup>Residues that are within 10Å distance of amino acid residues in other proteins<sup>4</sup>Residues that are within 10Å distance of nucleotide residues in rRNAs<sup>5</sup>Percentage as (the count of contact residues/sequence length)\*100%

**Supplementary Table S6.** Pair-wise amino acid sequence identity of ribosomal proteins.

| Gene group | Gene  | Overall | Pair-wise identity |                       |
|------------|-------|---------|--------------------|-----------------------|
|            |       |         | All contact sites  | Protein contact sites |
| CpRP       | rps2  | 80.7    | 83.4               | 87.8                  |
| CpRP       | rps3  | 71.5    | 77.7               | 76.5                  |
| CpRP       | rps4  | 84.1    | 86.3               | 86.3                  |
| CpRP       | rps7  | 82.2    | 83.1               | 80.6                  |
| CpRP       | rps8  | 81.2    | 80.8               | 84.5                  |
| CpRP       | rps11 | 76.3    | 79.4               | 81.6                  |
| CpRP       | rps12 | 87.1    | 87.2               | 78.9                  |
| CpRP       | rps14 | 86.1    | 86.7               | 85                    |
| CpRP       | rps15 | 80.4    | 80.6               | 90.2                  |
| CpRP       | rps16 | 84.9    | 86.8               | n/a                   |
| CpRP       | rps18 | 68.6    | 78.8               | 79.2                  |
| CpRP       | rps19 | 75.7    | 76.4               | 75.5                  |
| CpRP       | rpl32 | 75.6    | 75.6               | 73.6                  |
| CpRP       | rpl33 | 77      | 78.1               | 80                    |
| CpRP       | rpl36 | 86.4    | 86.4               | 89.1                  |
| CpRP       | rpl2  | 90.9    | 91.2               | 100                   |
| CpRP       | rpl14 | 81.2    | 82.3               | 79.8                  |
| CpRP       | rpl16 | 90.4    | 90.6               | 91.5                  |
| CpRP       | rpl20 | 73.4    | 73.4               | 74.8                  |
| NuCpRP     | rps5  | 70.8    | 77                 | 75.3                  |
| NuCpRP     | rps6  | 76.2    | 72.8               | 81                    |
| NuCpRP     | rps9  | 79.3    | 84.6               | 77.8                  |
| NuCpRP     | rps10 | 87.2    | 87.7               | 84.9                  |
| NuCpRP     | rps13 | 81.7    | 86.4               | 85.6                  |
| NuCpRP     | rps20 | 71.6    | 74.8               | 53.8                  |
| NuCpRP     | rpl31 | 72.3    | n/a                | 88.3                  |
| NuCpRP     | rpl34 | 83.9    | 88.5               | 100                   |
| NuCpRP     | rpl35 | 85      | 83.7               | 82.6                  |
| NuCpRP     | rpl1  | 83.7    | 92.6               | 88.7                  |
| NuCpRP     | rpl3  | 89.2    | 92.6               | 88.8                  |
| NuCpRP     | rpl4  | 79.1    | 81.8               | 83.9                  |
| NuCpRP     | rpl5  | 77      | 81.6               | 84.4                  |
| NuCpRP     | rpl6  | 84.2    | 89.1               | 82.8                  |
| NuCpRP     | rpl11 | 89.8    | 89                 | 61.3                  |
| NuCpRP     | rpl13 | 88.6    | 91.5               | 92                    |
| NuCpRP     | rpl15 | 87.9    | 90.4               | 92.5                  |
| NuCpRP     | rpl17 | 92.7    | 93.5               | 93.5                  |
| NuCpRP     | rpl18 | 85.2    | 86                 | 90                    |
| NuCpRP     | rpl19 | 73.8    | 77.9               | 75                    |
| NuCpRP     | rpl21 | 85      | 87.3               | 85.8                  |
| NuCpRP     | rpl24 | 80      | 82.7               | n/a                   |
| NuCpRP     | rpl27 | 81.9    | 90.2               | 89.4                  |
| NuCpRP     | rpl28 | 84.7    | 83.2               | 77.9                  |
| NuCpRP     | rpl29 | 74.1    | 73.5               | 67.5                  |
| Mean       |       | 81.3    | 83.8               | 82.8                  |

**Reference:**

- Wertheim JO, Murrell B, Smith MD, Kosakovsky Pond SL, Scheffler K. 2015. RELAX: detecting relaxed selection in a phylogenetic framework. *Mol Biol Evol* 32:820–832.
- Yu G, Smith D, Zhu H, Guan Y, Lam TT. submitted. ggtree: an R package for visualization and annotation of phylogenetic tree with different types of meta-data. *Methods Ecol Evol* (Available at <https://bioconductor.org/packages/release/bioc/html/ggtree.html>)
